# Supplementary material
Source: publisher site journal article supplement (https://www.dovepress.com/article/414986)
Supplement: Supplementary file 1 [file get_supplementary_file.php]

Supplement (1): Morning Report Practice Survey Questionnaire

1. **What is your age?**  Y
2. **What is your gender**? M F
3. **What is your training year?** R1 R2 R3 R4
4. **How frequent is the morning report per week?**

- No morning report
- 3 times or less
- 4 Times
- 5 Times (weekdays only)
- Daily (including weekends)
- Other (please specify)

1. **What is the usual duration of the morning report?**

- <15 minutes
- 15 to 30 minutes
- 30 -45 minutes
- 45 - 60 minutes
- >60 minutes
- Other (please specify)

1. **What is the usual morning report format? (you may select more than one)**

- Handover + emergency long case presentation and discussion
- Emergency long-case presentation only and discussion
- Handover + inpatient long-case presentation and discussion
- Inpatient long-case presentation only and discussion
- Long and short cases presentation
- Journal club on some days
- Exam Preparation (e.g., MCQS, OSCE)
- Handover only
- Other: (Please specify)

1. **Who is the unusual morning report facilitator (moderator)?**

- Consultant
- Senior resident
- Junior resident
- Not consistent
- Other: (please specify)

1. **What are your reasons for attending the morning report regularly? (You may select more than one):**
   - Mandatory attendance
   - Case discussion
   - Educational benefit
   - Facilitator (Moderator)
   - Other( please specify)
2. **What are your reasons for not attending the morning report regularly? (you may select more than one):**

- Embarrassing questions
- Facilitator (Moderator)
- Busy with patient
- No educational benefit
- Other (please specify)

1. **On a scale from 1 (very low) to 5 (Very High), please rate your motivation for involvement in the morning report:**

|  | Very low | Low | Intermediate | | High | Very High |
| --- | --- | --- | --- | --- | --- | --- |
| - Regular Attendance |  |  |  |  | |  |
| - Active participation (presenting, commenting, or asking questions) |  |  |  |  | |  |
| - Taking a facilitator (moderator) role |  |  |  |  | |  |

1. On a scale from 1 (very low) to 5 (Very High), please rate the contribution of the morning report to your role development, overall education, and performance in the exam**:**

|  | Very low | Low | Intermediate | High | Very High |
| --- | --- | --- | --- | --- | --- |
| - Medical expert |  |  |  |  |  |
| - Leader |  |  |  |  |  |
| - Communicator |  |  |  |  |  |
| - Scholar |  |  |  |  |  |
| - Professional |  |  |  |  |  |
| - Overall education |  |  |  |  |  |
| - Performance in the exam |  |  |  |  |  |

**12. On a scale from 1 (very low) to 5 (Very High), please rate the impact of the morning report on your practice of:**

|  | Very low | Low | Intermediate | High | Very High |
| --- | --- | --- | --- | --- | --- |
| - Evidence Based Medicine |  |  |  |  |  |
| - Quality improvement and patient safety |  |  |  |  |  |
